# Supplementary material for: ZIF-8 integrated with polydopamine coating as a novel nano-platform for skin-specific drug delivery
Source: Royal Society of Chemistry journal article supplement (doi:10.1039/d2tb02361j), 2023-01-01
Supplement: d2tb02361j1.pdf [file d2tb02361j1.pdf]

ARTICLE

## ZIF-8 Integrated with Polydopamine Coating as A Novel Nano-platform for Skin-Specific Drug Delivery

Received 00th January 20xx,  
Accepted 00th January 20xx

DOI: 10.1039/x0xx00000x

Qiuyue Wang<sup>a</sup>, Mingming Li<sup>a</sup>, Xinxing Sun<sup>a</sup>, Naiying Chen<sup>a</sup>, Sicheng Yao<sup>a</sup>, Xun Feng<sup>b</sup> and Yang Chen<sup>\*a</sup>

a. Department of Pharmaceutics, School of Pharmacy, China Medical University, No.77 Puhe Road, Shenyang North New Area, Shenyang, 110122, China.

b. Department of Sanitary Chemistry, School of Public Health, Shenyang Medical College, No.146 Yellow River North Street, Shenyang, 110034, China

\*Corresponding Author

Yang Chen

Department of Pharmaceutics, School of Pharmacy, China Medical University, No.77 Puhe Road, Shenyang North New Area, Shenyang, 110122, China

Email: chenyangpharm@163.com; yangchen@cmu.edu.cn

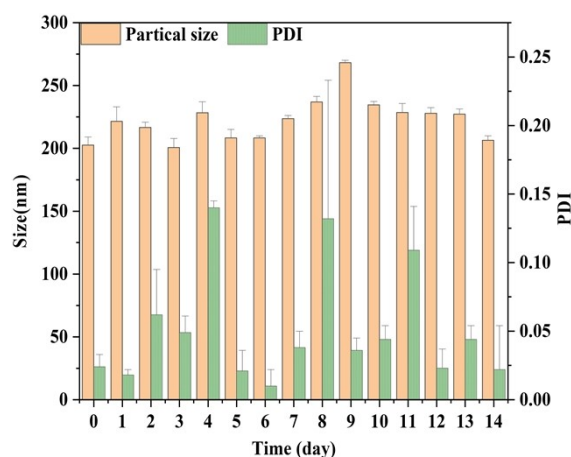

Fig. S1 *In vitro* stability studies of 5-FU@ZIF-8 in 14 days.

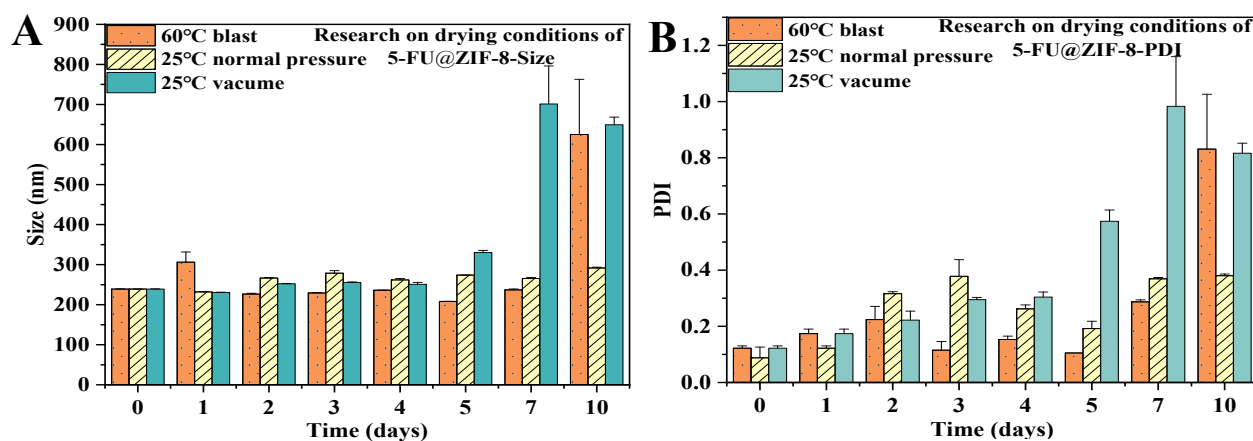

Fig. S2 Investigation of the drying conditions at 5-FU@ZIF-8. (A) Size. (B) PDI.

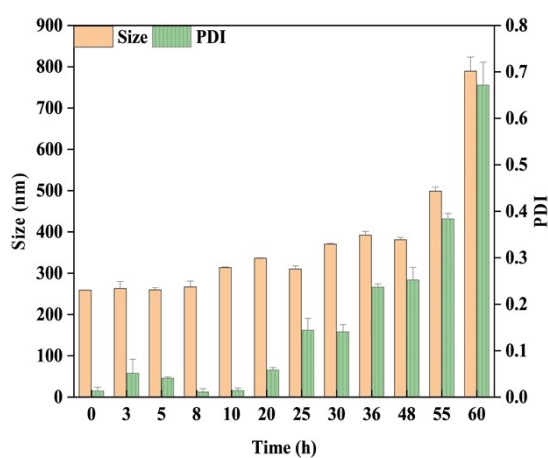

Fig. S3 *In vitro* stability studies of 5-FU@ZIF-8@PDA in 60 h.

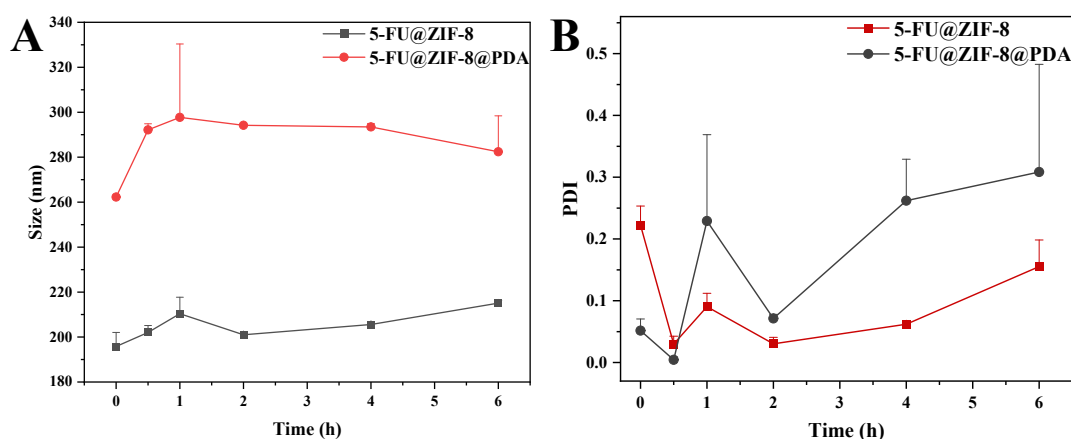

Fig. S4 *In vivo* stability studies of 5-FU@ZIF-8 and 5-FU@ZIF-8@PDA. (A) The size change of as-prepared nanoparticles during the skin penetration experiment for 6 h. (B) The PDI change of as-prepared nanoparticles during the skin penetration experiment for 6 h.

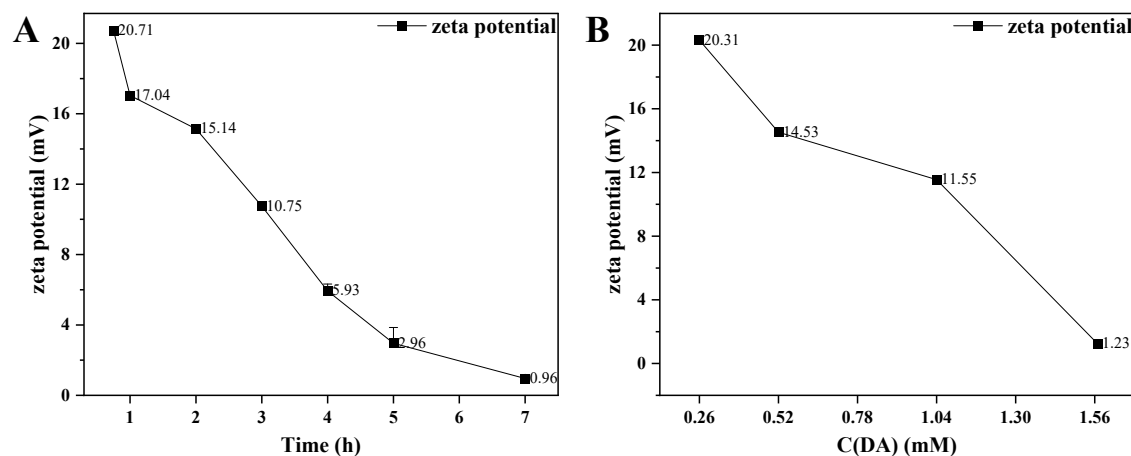

**Fig. S5** Zeta potential of 5-FU@ZIF-8@PDA. (A) Zeta potential of 5-FU@ZIF-8@PDA at different time for stirring. (B) Zeta potential of 5-FU@ZIF-8@PDA at different DA concentrations.

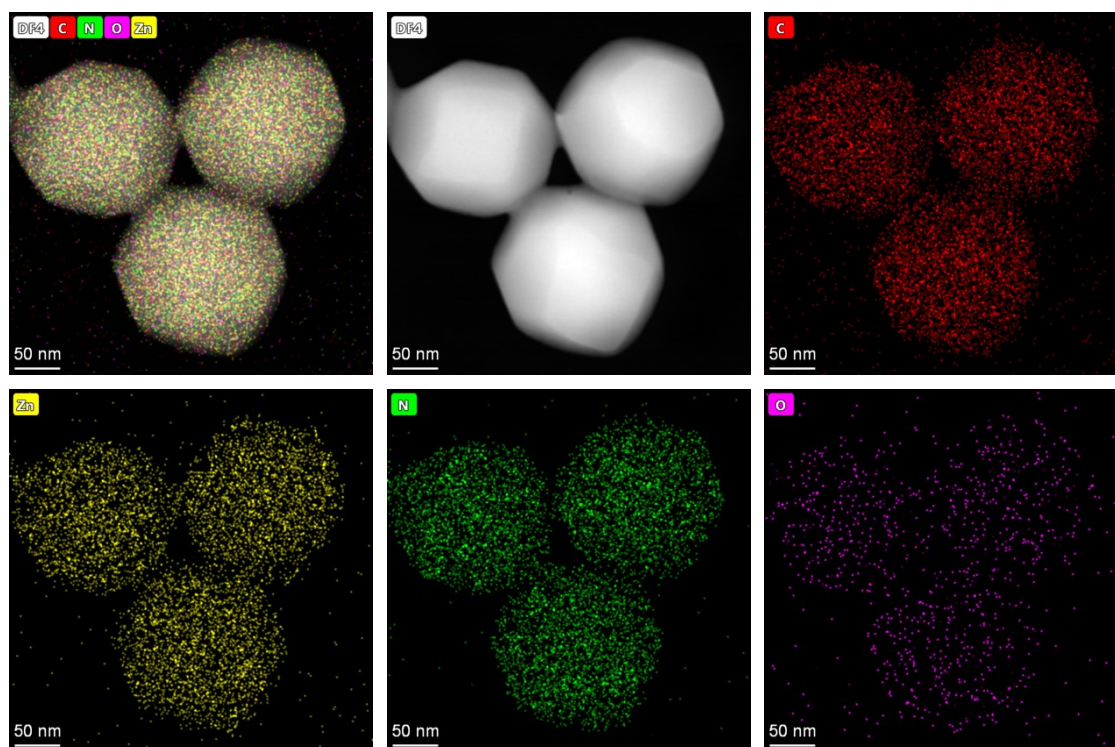

**Fig. S6** EDS mapping of 5-FU@ZIF-8@PDA nanoparticles.

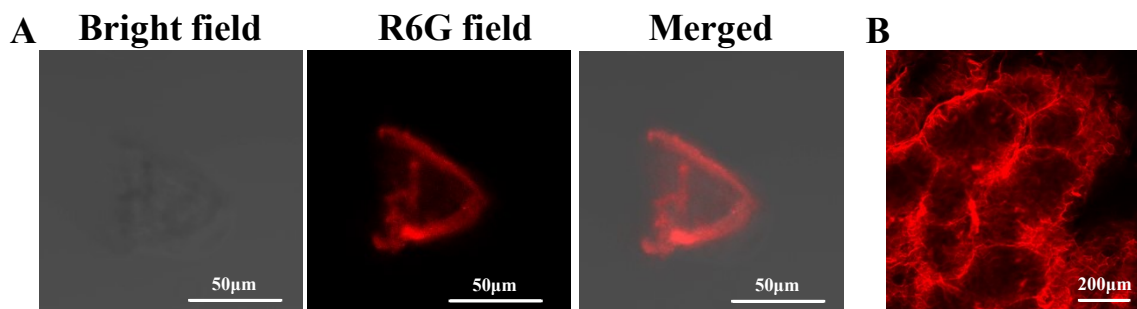

**Fig. S7** CLSM image of R6G solution ( $1 \mu\text{g}\cdot\text{ml}^{-1}$ ). (A) Effects of R6G skin penetration on hair follicle pathways. (Original magnification of A was 600 $\times$ ). (B) Intercellular pathway. (Original magnification of B was 200 $\times$ ).

**Table S1** Investigation of the preparation process of 5-FU@ZIF-8@PDA (n = 3, Mean  $\pm$  SD).

| Factor              | Group       | Increase value of size (nm) | PDI               |
|---------------------|-------------|-----------------------------|-------------------|
| C(DA) (mM)          | <b>0.26</b> | 69.0                        | 0.111 $\pm$ 0.043 |
|                     | 0.52        | 3858.0                      | 0.279 $\pm$ 0.134 |
|                     | 1.04        | 3918.0                      | 0.129 $\pm$ 0.054 |
|                     | 1.56        | 3360.0                      | 0.283 $\pm$ 0.050 |
| Stirring time (min) | 30          | 53.1                        | 0.236 $\pm$ 0.030 |
|                     | <b>45</b>   | 69.0                        | 0.299 $\pm$ 0.032 |
|                     | 60          | 182.1                       | 0.482 $\pm$ 0.031 |
| m(DA):m(MOF)        | 1:60        | 206.7                       | 0.371 $\pm$ 0.023 |
|                     | <b>1:80</b> | 69.0                        | 0.037 $\pm$ 0.034 |
|                     | 1:100       | 79.0                        | 0.299 $\pm$ 0.023 |
